# Supplementary material for: Patterns of occurrence and implications of neratinib-associated diarrhea in patients with HER2-positive breast cancer: analyses from the randomized phase III ExteNET trial
Source: Breast Cancer Res. 2019 Feb 27;21:32. doi: 10.1186/s13058-019-1112-5 (PMC6391844; doi:10.1186/s13058-019-1112-5)
Supplement: Supplementary file 1 — Table S1. Diarrhea grading (National Cancer Institute Common Terminology Criteria, version 3.0). Table S2. Baseline characteristics of patients (intention-to-treat population). Table S3. Drug exposure by diarrhea grade (safety population). Table S4. Predictors of diarrhea. Table S5. Blood chemistry results outside of normal range (safety population). Figure S1. ExteNET CONSORT flowchart. Figure S2. Kaplan-Meier curves of invasive disease-free survival by worst grade of diarrhea experienced by patients in the neratinib group in the first 7 days (intention-to-treat population with a treatment duration > 1 month). Figure S3. Mean (± standard deviation) Functional Assessment of Cancer Therapy – Breast (FACT-B) total scores over time by diarrhea grade for (A) neratinib and (B) placebo with last observation carried forward. (PDF 305 kb) [file 13058_2019_1112_MOESM1_ESM.pdf]

## Electronic Supplementary Material

**Title:** Patterns of occurrence and implications of neratinib-associated diarrhea in patients with HER2-positive breast cancer: analyses from the randomized phase 3 ExteNET trial

**Journal:** *Breast Cancer Research and Treatment*

**Authors:** Joanne Mortimer, Jack Di Palma, Kendra Schmid, Yining Ye, Mohammad Jahanzeb

**Corresponding author:** Prof. Joanne Mortimer  
City of Hope Comprehensive Cancer Center  
1500 East Duarte Road, Duarte  
CA 91010  
USA  
**E-mail:** JMortimer@coh.org

**Supplementary Table 1. Diarrhea grading (National Cancer Institute Common Terminology Criteria, version 3.0)**

| Grade | Description                                                                                                                                                                                                         |
|-------|---------------------------------------------------------------------------------------------------------------------------------------------------------------------------------------------------------------------|
| 1     | Increase of <4 stools per day or mild increase in ostomy output compared with baseline                                                                                                                              |
| 2     | Increase of 4–6 stools per day or moderate increase in ostomy output compared with baseline, intravenous fluids <24 hours, and no interference with activities of daily living                                      |
| 3     | Increase of $\geq 7$ stools per day or severe increase in ostomy output compared with baseline, incontinence, intravenous fluids $\geq 24$ hours, hospitalization, and interference with activities of daily living |
| 4     | Life-threatening consequences (e.g. hemodynamic collapse) or death                                                                                                                                                  |

**Supplementary Table 2. Baseline characteristics of patients (intention-to-treat population)<sup>a</sup>**

| <b>Characteristic</b>                                   | <b>Neratinib<br/>(N = 1420)</b> | <b>Placebo<br/>(N = 1420)</b> |
|---------------------------------------------------------|---------------------------------|-------------------------------|
| Region                                                  |                                 |                               |
| North America                                           | 519 (37)                        | 477 (34)                      |
| Western Europe, Australia, New Zealand and South Africa | 487 (34)                        | 532 (38)                      |
| Asia Pacific, East Europe and South America             | 414 (29)                        | 411 (29)                      |
| Race                                                    |                                 |                               |
| White                                                   | 1165 (82)                       | 1135 (80)                     |
| Black                                                   | 27 (2)                          | 47 (3)                        |
| Asian                                                   | 188 (13)                        | 197 (14)                      |
| Other                                                   | 40 (3)                          | 41 (3)                        |
| Age at randomization, years                             |                                 |                               |
| <35                                                     | 46 (3)                          | 55 (4)                        |
| 35–49                                                   | 523 (37)                        | 515 (36)                      |
| 50–59                                                   | 497 (35)                        | 488 (34)                      |
| ≥60                                                     | 354 (25)                        | 362 (26)                      |
| Age, years                                              |                                 |                               |
| Median (range)                                          | 52.0 (25.0–83.0)                | 52.0 (23.0–82.0)              |
| Menopausal status at diagnosis                          |                                 |                               |
| Premenopausal                                           | 663 (47)                        | 664 (47)                      |
| Postmenopausal                                          | 757 (53)                        | 756 (53)                      |
| Nodal status <sup>b</sup>                               |                                 |                               |
| Negative                                                | 335 (24)                        | 336 (24)                      |
| 1–3 positive nodes                                      | 664 (47)                        | 664 (47)                      |
| ≥4 positive nodes                                       | 421 (30)                        | 420 (30)                      |
| Hormone receptor status <sup>b</sup>                    |                                 |                               |
| Positive (ER and/or PR positive)                        | 816 (58)                        | 815 (57)                      |
| Negative (ER and PR negative)                           | 604 (43)                        | 605 (43)                      |
| Prior trastuzumab regimen <sup>b</sup>                  |                                 |                               |
| Concurrent                                              | 884 (62)                        | 886 (62)                      |
| Sequential                                              | 536 (38)                        | 534 (38)                      |
| T category                                              |                                 |                               |
| T1                                                      | 440 (31)                        | 459 (32)                      |
| T2                                                      | 585 (41)                        | 555 (39)                      |
| T3 and above                                            | 144 (10)                        | 117 (8)                       |
| Unknown                                                 | 250 (18)                        | 288 (20)                      |
| Missing                                                 | 1 (<1)                          | 1 (<1)                        |
| Histologic grade of tumor                               |                                 |                               |
| Undifferentiated/poorly differentiated                  | 670 (47)                        | 689 (49)                      |

|                                                                                       |                  |                  |
|---------------------------------------------------------------------------------------|------------------|------------------|
| Moderately differentiated                                                             | 461 (33)         | 416 (29)         |
| Well differentiated                                                                   | 76 (5)           | 65 (5)           |
| Unknown                                                                               | 213 (15)         | 241 (17)         |
| Prior surgery                                                                         |                  |                  |
| Lumpectomy only                                                                       | 468 (33)         | 511 (36)         |
| Mastectomy                                                                            | 951 (67)         | 908 (64)         |
| Missing                                                                               | 1 (<1)           | 1 (<1)           |
| Prior radiotherapy                                                                    |                  |                  |
| Yes                                                                                   | 1130 (80)        | 1150 (81)        |
| No                                                                                    | 290 (20)         | 270 (19)         |
| Prior (neo)adjuvant therapy <sup>c</sup>                                              |                  |                  |
| Yes                                                                                   | 1420 (100)       | 1420 (100)       |
| Trastuzumab                                                                           | 1420 (100)       | 1420 (100)       |
| Anthracycline only                                                                    | 136 (10)         | 135 (10)         |
| Anthracycline plus taxane                                                             | 962 (68)         | 965 (68)         |
| Taxane only                                                                           | 318 (22)         | 316 (22)         |
| Non-anthracycline or taxane                                                           | 4 (<1)           | 4 (<1)           |
| Duration of prior adjuvant trastuzumab therapy, months                                | <i>N</i> = 1413  | <i>N</i> = 1416  |
| Median (IQR)                                                                          | 11.5 (10.9-11.9) | 11.4 (10.8-11.9) |
| Time since last dose of trastuzumab to randomization, months                          |                  |                  |
| Median (IQR)                                                                          | 4.4 (1.6-10.4)   | 4.6 (1.5-10.8)   |
| Concomitant endocrine therapy for patients with hormone-positive disease <sup>d</sup> |                  |                  |
| No                                                                                    | 56 (7)           | 51 (6)           |
| Yes                                                                                   | 760 (93)         | 764 (94)         |
| Anti-estrogen only                                                                    | 375 (46)         | 347 (43)         |
| Anti-estrogen and aromatase inhibitor (sequential)                                    | 20 (3)           | 34 (4)           |
| Aromatase inhibitor only                                                              | 362 (44)         | 379 (47)         |
| Non-anti-estrogen or aromatase inhibitor                                              | 3 (<1)           | 4 (<1)           |

---

Data are *N* (%), unless otherwise stated.

ER, estrogen receptor; IQR, interquartile range; PR, progesterone receptor.

<sup>a</sup>Because of rounding, not all percentages total to 100.

<sup>b</sup>Stratification factor collected from the interactive voice- and web-response system. For nodal status, the number of positive nodes was recorded at the time of initial diagnosis (for those who received adjuvant therapy) or surgery (for those who received neoadjuvant therapy). Patients with residual invasive disease in the breast but node negative or unknown nodal status in the axilla after neoadjuvant therapy were included under “1–3” positive nodes.

<sup>c</sup>Percentage is based on the number of patients with hormone receptor-positive disease. Tumors were assessed as being ER or PR positive based on local pathology laboratory cut-offs. There was no protocol specification as to whether a 1% or 10% threshold should be used.

<sup>d</sup>Proportion of patients who received neoadjuvant chemotherapy in the neratinib group was 25% and in the placebo group it was 27%.

**Supplementary Table 3. Drug exposure by diarrhea grade (safety population)**

|                                         | <b>Neratinib</b><br>( <i>N</i> = 1408) <sup>a</sup> | <b>Placebo</b><br>( <i>N</i> = 1408) |
|-----------------------------------------|-----------------------------------------------------|--------------------------------------|
| <b>Grade 1 or no diarrhea, <i>N</i></b> | <b>388</b>                                          | <b>1291</b>                          |
| Median (IQR) treatment duration, months | 11.7 (5.1–12.0)                                     | 11.8 (11.5–12.0)                     |
| Mean (SD) relative dose intensity, %    | 96 (10)                                             | 98 (5)                               |
| Dose reduction, <i>N</i> (%)            | 52 (13)                                             | 96 (7)                               |
| Dose hold, <i>N</i> (%)                 | 154 (40)                                            | 554 (43)                             |
| <b>Grade 2 diarrhea, <i>N</i></b>       | <b>458</b>                                          | <b>94</b>                            |
| Median (IQR) treatment duration, months | 11.7 (3.2–12.0)                                     | 11.9 (11.5–12.0)                     |
| Mean (SD) relative dose intensity, %    | 90 (15)                                             | 97 (5)                               |
| Dose reduction, <i>N</i> (%)            | 150 (33)                                            | 11 (12)                              |
| Dose hold, <i>N</i> (%)                 | 278 (61)                                            | 55 (59)                              |
| <b>Grade 3 diarrhea, <i>N</i></b>       | <b>561</b>                                          | <b>23</b>                            |
| Median (IQR) treatment duration, months | 11.5 (1.3–11.9)                                     | 11.6 (11.0–11.9)                     |
| Mean (SD) relative dose intensity, %    | 80 (21)                                             | 96 (7)                               |
| Dose reduction, <i>N</i> (%)            | 317 (57)                                            | 2 (22)                               |
| Dose hold, <i>N</i> (%)                 | 417 (74)                                            | 14 (61)                              |

IQR, interquartile range; SD, standard deviation.

<sup>a</sup>In the neratinib group, 1 patient with grade 4 diarrhea was excluded.

**Supplementary Table 4. Blood chemistry results outside of normal range (safety population)**

| <b>Parameter, N (%)</b> | <b>Normal range</b> | <b>Neratinib<br/>(N = 1408)</b> | <b>Placebo<br/>(N = 1408)</b> |
|-------------------------|---------------------|---------------------------------|-------------------------------|
| Albumin                 | 35–50 g/L           | N = 1384                        | N = 1389                      |
| High                    |                     | 86 (6)                          | 104 (8)                       |
| Low                     |                     | 103 (7)                         | 91 (7)                        |
| Blood urea nitrogen     | 3.6–7.1 mmol/L      | N = 700                         | N = 703                       |
| High                    |                     | 237 (34)                        | 221 (31)                      |
| Low                     |                     | 212 (30)                        | 242 (34)                      |
| Calcium                 | 2.25–2.62 mmol/L    | N = 1405                        | N = 1407                      |
| High                    |                     | 52 (4)                          | 72 (5)                        |
| Low                     |                     | 687 (49)                        | 604 (43)                      |
| Creatinine              | 44–97 Umol/L        | N = 1403                        | N = 1407                      |
| High                    |                     | 176 (13)                        | 129 (9)                       |
| Low                     |                     | 62 (4)                          | 100 (7)                       |
| Lactate dehydrogenase   | 105–333 U/L         | N = 1394                        | N = 1400                      |
| High                    |                     | 348 (25)                        | 370 (26)                      |
| Low                     |                     | 25 (2)                          | 32 (2)                        |
| Magnesium               | 0.65–1.0 mmol/L     | N = 1392                        | N = 1400                      |
| High                    |                     | 72 (5)                          | 84 (6)                        |
| Low                     |                     | 100 (7)                         | 71 (5)                        |
| Phosphate               | 0.97–1.45 mmol/L    | N = 1386                        | N = 1398                      |
| High                    |                     | 161 (12)                        | 196 (14)                      |
| Low                     |                     | 630 (46)                        | 604 (43)                      |
| Potassium               | 3.5–5 mmol/L        | N = 1406                        | N = 1407                      |
| High                    |                     | 158 (11)                        | 176 (13)                      |
| Low                     |                     | 105 (8)                         | 111 (8)                       |
| Sodium                  | 136–145 mmol/L      | N = 1407                        | N = 1407                      |
| High                    |                     | 146 (10)                        | 150 (11)                      |
| Low                     |                     | 162 (12)                        | 153 (11)                      |

**Supplementary Fig 1. ExteNET CONSORT flowchart**

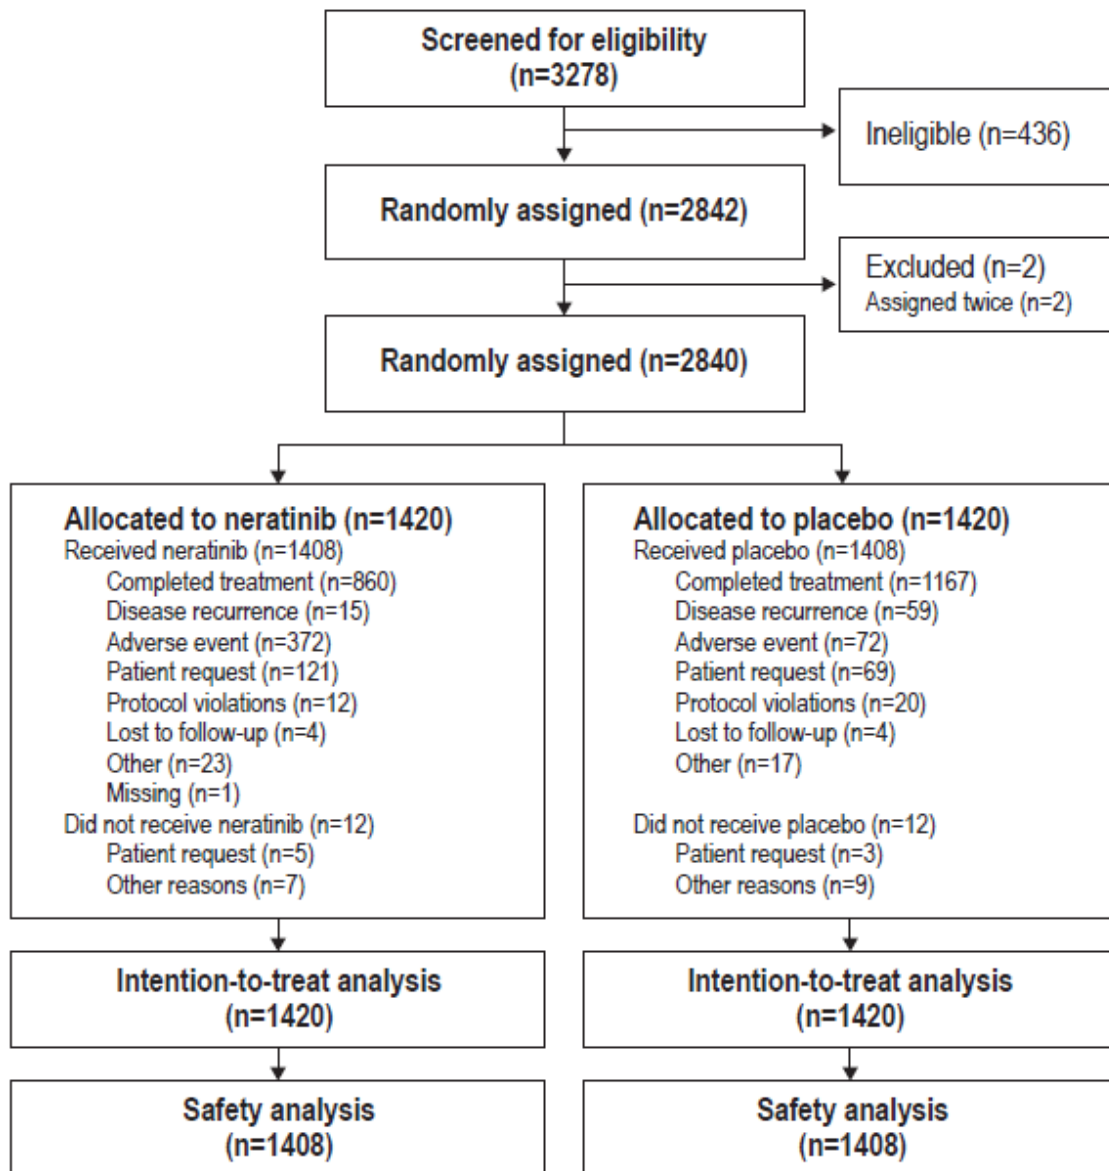

**Supplementary Fig 2. Kaplan-Meier curves of invasive disease-free survival by worst grade of diarrhea experienced by patients in the neratinib group in the first 7 days (intention-to-treat population with a treatment duration >1 month)**

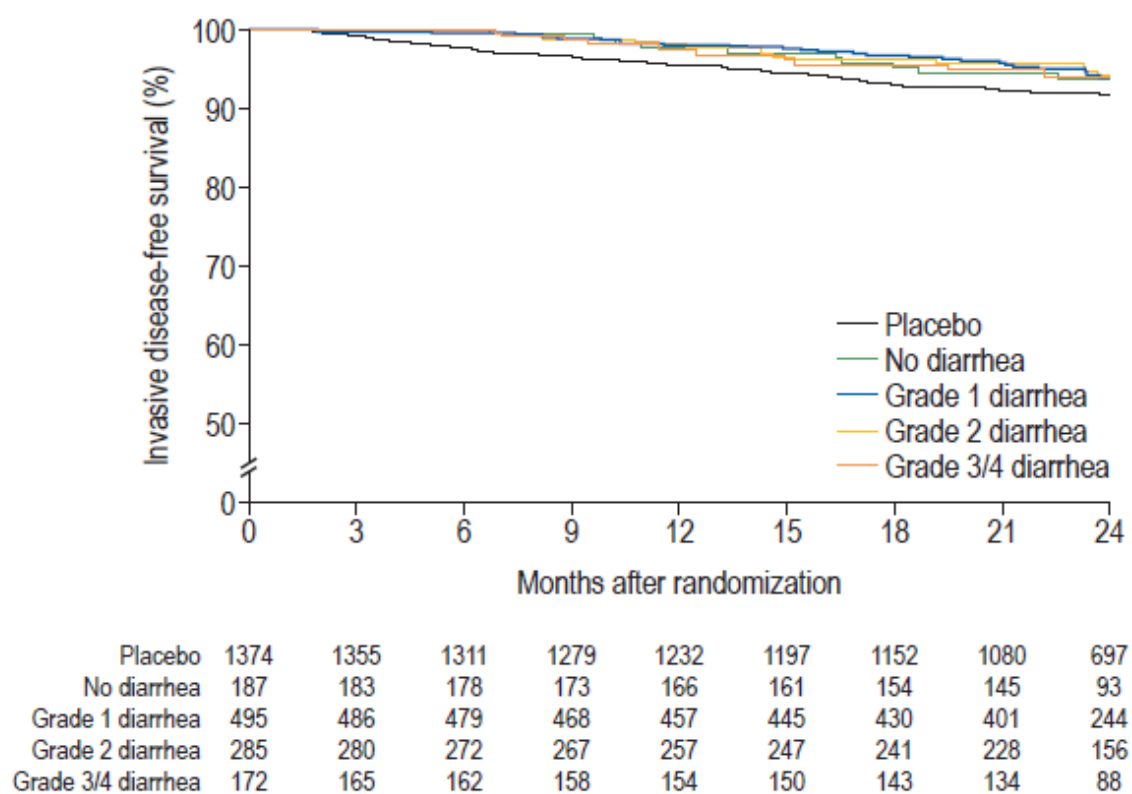

Invasive disease-free survival defined as the time from randomization to first occurrence of invasive ipsilateral tumor recurrence, invasive contralateral breast cancer, local/regional invasive recurrence, distant recurrence, or death from any cause.

**Supplementary Fig 3. Mean ( $\pm$  standard deviation) Functional Assessment of Cancer Therapy – Breast (FACT-B) total scores over time by diarrhea grade for (A) neratinib and (B) placebo with last observation carried forward**

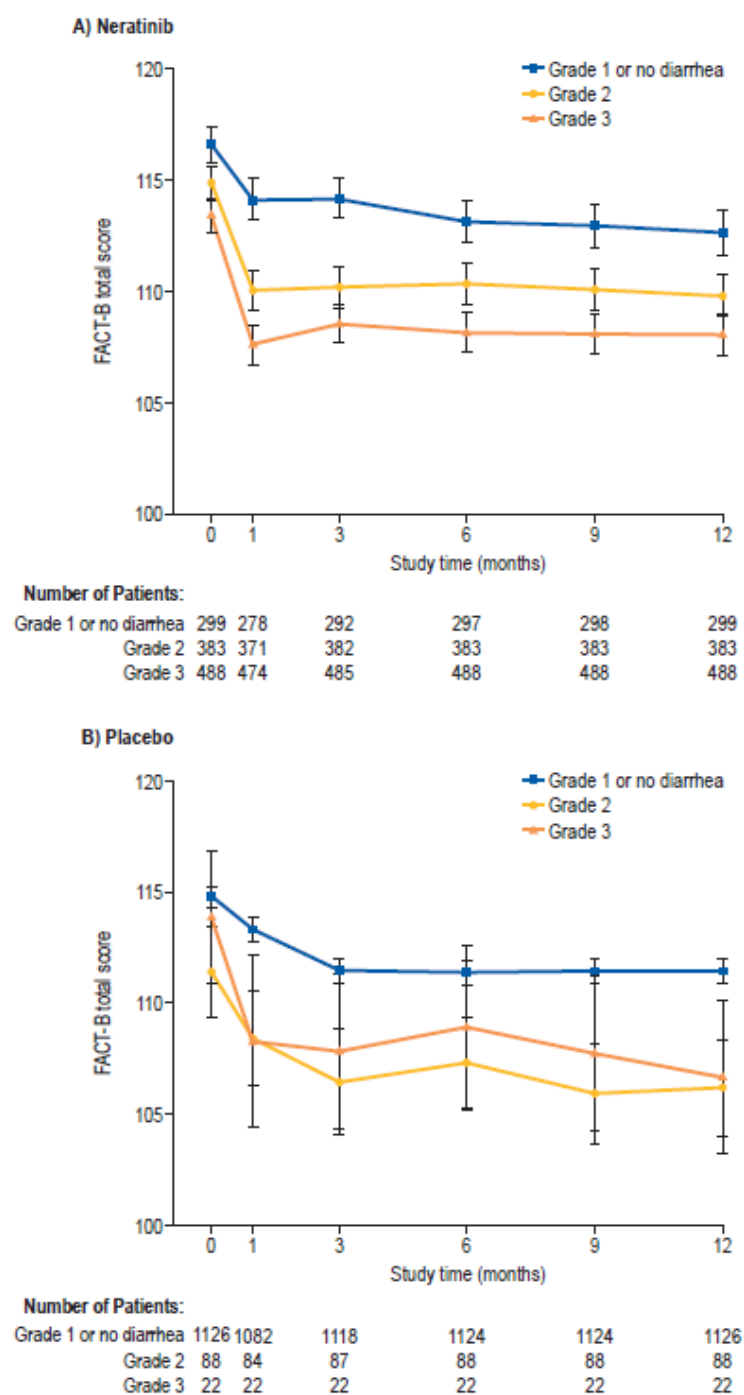

Minimally important difference: 7–8 points. A higher score indicates better quality of life.
